# Supplementary material
Source: publisher site journal article supplement (http://kjim.org/upload/media/kjim-2021-021-suppl1.pdf)
Supplement: Supplementary file 1 [file kjim-2021-021-suppl1.pdf]

**Supplementary Table 1. Potential factors associated with hyperammonemia at admission**

| Variable                | Overall    | Normal ammonia | High ammonia | p value |
|-------------------------|------------|----------------|--------------|---------|
| Number                  | 972 (100)  | 585 (60.2)     | 387 (39.8)   |         |
| Generalized seizures    | 33 (3.4)   | 17 (2.9)       | 16 (4.1)     | 0.366   |
| Hematologic malignancy  | 6 (0.6)    | 2 (0.3)        | 4 (1.0)      | 0.223   |
| AKI                     | 314 (32.3) | 157 (26.8)     | 157 (40.6)   | < 0.001 |
| GI bleeding             | 21 (2.2)   | 10 (1.7)       | 11 (2.8)     | 0.264   |
| Gastric bypass surgery  | 16 (1.6)   | 11 (1.9)       | 5 (1.3)      | 0.610   |
| TPN                     | 6 (0.6)    | 1 (0.2)        | 5 (1.3)      | 0.040   |
| Valproate/Carbamazepine | 4 (0.4)    | 2 (0.3)        | 2 (0.5)      | 0.652   |
| PPI                     | 45 (4.6)   | 28 (4.8)       | 17 (4.4)     | 0.876   |
| Steroid                 | 23 (2.4)   | 14 (2.4)       | 9 (2.3)      | 1.000   |
| Infection               | 387 (39.8) | 211 (36.1)     | 176 (45.5)   | 0.004   |
| Trauma                  | 58 (6.0)   | 38 (6.5)       | 20 (5.2)     | 0.411   |

Values are presented as number (%).

AKI, acute kidney injury; GI, gastrointestinal; TPN, total parenteral nutrition; PPI, proton pump inhibitor.
